# Supplementary material
Source: PubMed Central journal article supplement (PMC7553144)
Supplement: NIHMS1604094-supplement-1.pdf [file NIHMS1604094-supplement-1.pdf]

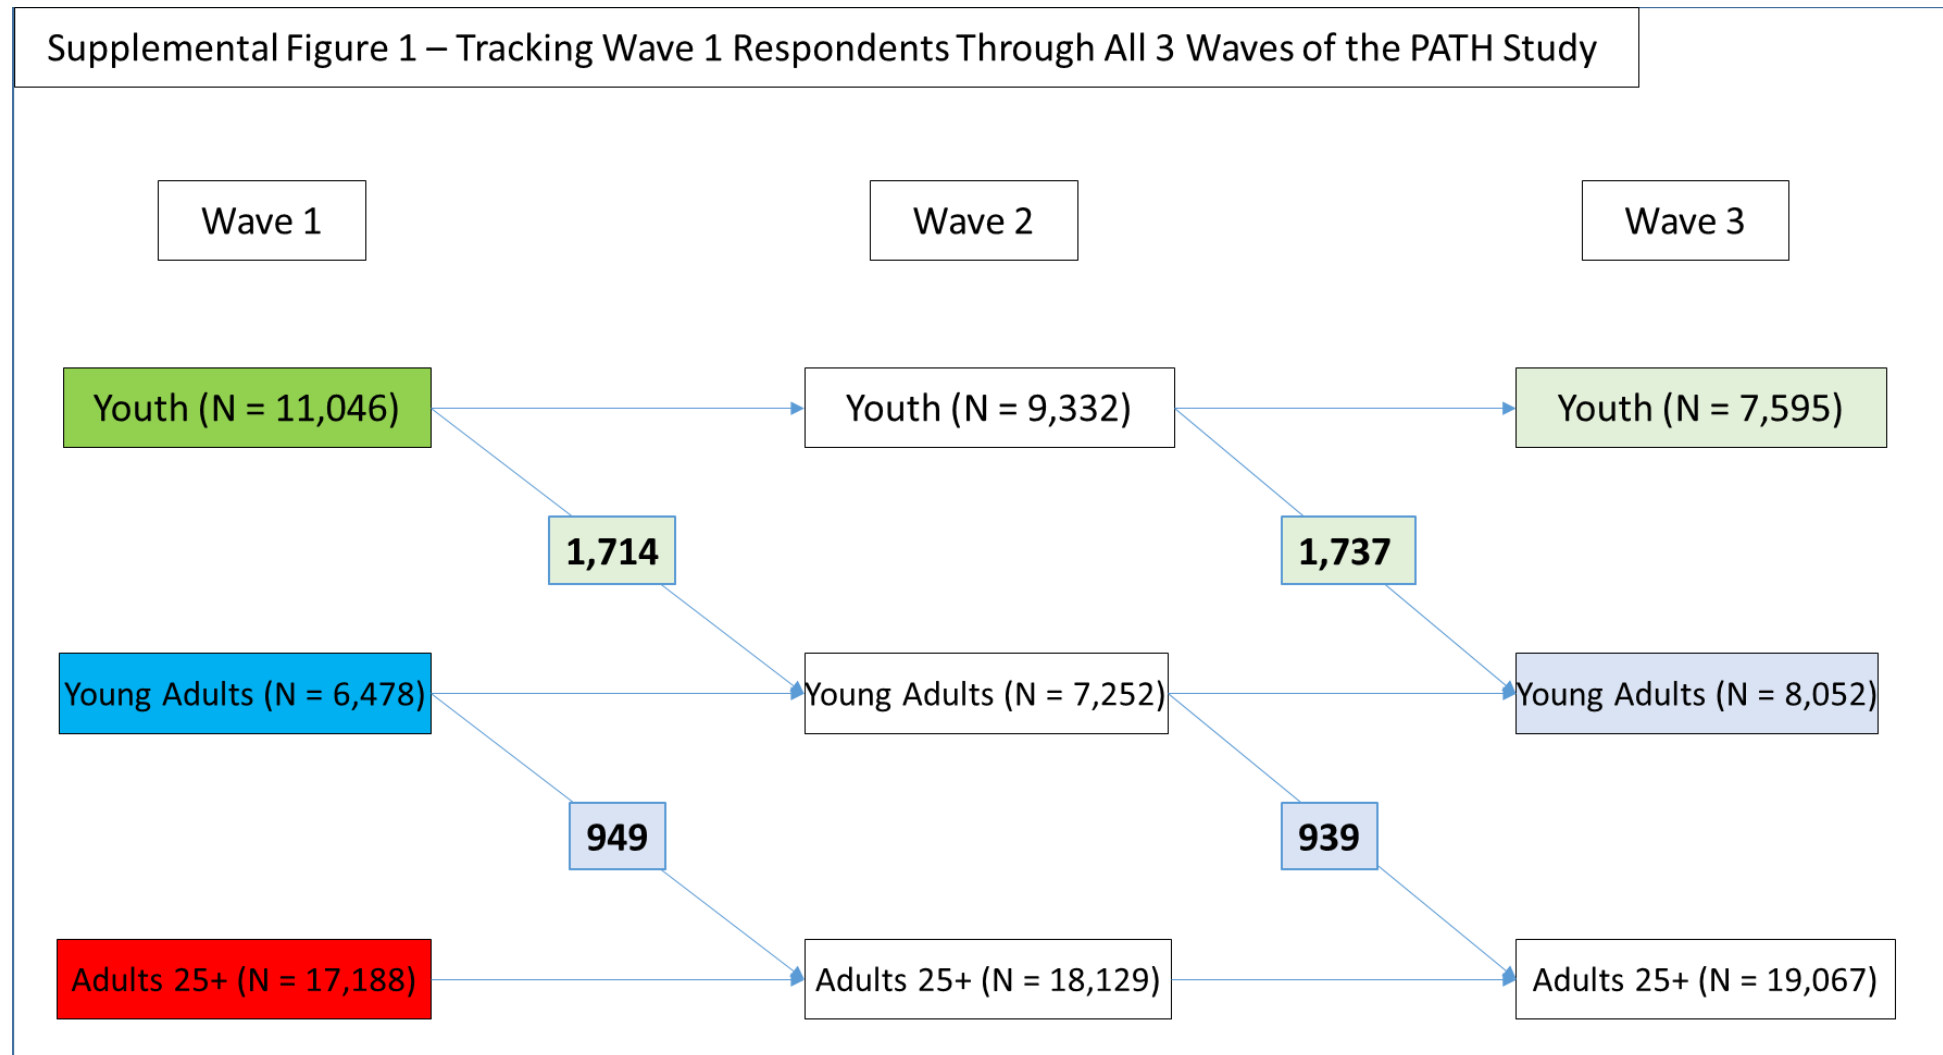

Notes: Supplemental Figure 1 shows the full Wave 1 sample respondents who have data at Waves 1, 2, and 3. There are 2,605 Wave 1 youth (ages 12-17) and 8,650 Wave 1 adult (ages 18 and older) respondents excluded at W2 and W3 because they do not have data at all three waves. The figure illustrates Wave 1 youth and young adults (ages 18-24) who aged up at Wave 2 and Wave 2 youth and young adults who aged up at Wave 3. The boxes at each wave show the total sample size for each age group at each wave.

1  
2  
3  
4  
5  
6  
7  
8  
9  
10  
11  
12  
13  
14  
15  
16  
17  
18  
19  
20  
21  
22  
23  
24  
25  
26  
27  
28  
29  
30  
31  
32  
33  
34  
35  
36  
37  
38  
39  
40  
41  
42  
43  
44  
45  
46  
47

Supplemental Figure 2: Conceptual Model of Use Pathways Among W1 Cigarette Use Groups Across W1-W2-W3

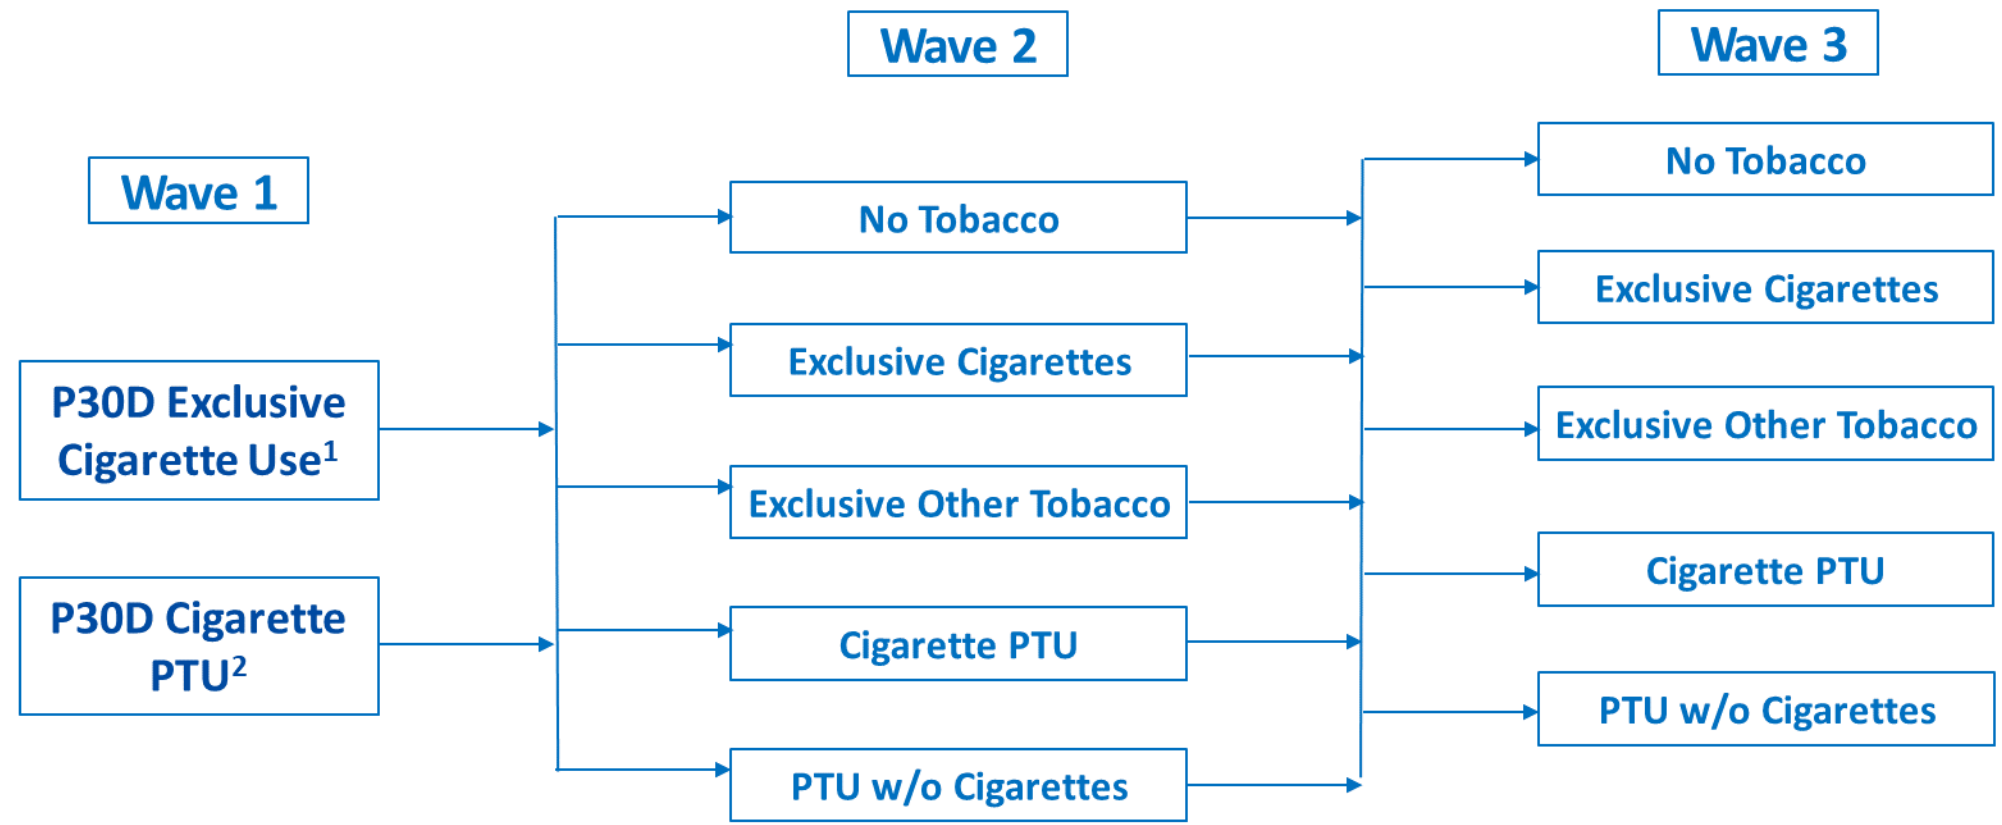

## Notes:

Abbreviations: W1 = Wave 1; W2 = Wave 2; W3 = Wave 3; P30D = past 30-day; PTU = polytobacco use; w/o = without

<sup>1</sup>Weighted percentages (95% confidence interval) and unweighted sample sizes of W1 P30D exclusive cigarette users among any P30D cigarette users: youth (ages 12-17), 42.9% (38.1-47.9), N = 201/483; young Adults (ages 18-24), 34.8% (32.6-37.0), N = 869/2,474; adults 25+ (ages 25 and older), 62.6% (61.1-64.0), N = 4,790/7,722

<sup>2</sup>Weighted percentages (95% confidence interval) and unweighted sample sizes of W1 P30D cigarette PTU among any P30D cigarette users: youth, 57.1% (52.1-61.9), N = 282/483; young adults, 65.2% (63.0-67.4), N = 1,605/2,474; adults 25+, 37.4% (36.0-38.9), N = 2,932/7,722

1) No tobacco: Defined as no use of any tobacco products within the past 30 days.

2) Exclusive cigarettes: Defined as use of only cigarettes within past 30 days.

3) Exclusive other tobacco: Defined as use of only one of the following within the past 30 days: cigars, hookah, pipe, electronic nicotine delivery system (ENDS\*), or smokeless tobacco.

4) Cigarette PTU: Defined as use of cigarettes and one or more of the following within the past 30 days: cigars, hookah, pipe, ENDS, or smokeless tobacco.

5) PTU w/o cigarettes: Defined as use of two or more of the following within the past 30 days: cigars, hookah, pipe, ENDS, or smokeless tobacco but not cigarettes.

\*Respondents were asked about P30D use of “e-cigarettes” at W1 and W2 and “e-products” (e-cigarettes, e-cigars, e-pipes, and e-hookah) at W3

These pathways have been enumerated in Supplemental Tables 1a-1c.

The logit-transformation method was used to calculate the 95% confidence intervals.

Analyses were run on the W1, W2, and W3 Public Use Files (<https://doi.org/10.3886/ICPSR36498.v8>).

Supplemental Table 1a: Transitions in P30D Product Use at W2 and W3 Among W1 P30D Exclusive Cigarette Users.

| Rows | W1                   | W2                      | W3                      | Youth        |            |            |             | Young Adults |            |            |             | Adults 25+   |            |            |             |
|------|----------------------|-------------------------|-------------------------|--------------|------------|------------|-------------|--------------|------------|------------|-------------|--------------|------------|------------|-------------|
|      |                      |                         |                         | Unweighted N | Weighted N | Weighted % | 95% CI      | Unweighted N | Weighted N | Weighted % | 95% CI      | Unweighted N | Weighted N | Weighted % | 95% CI      |
| 1    | Exclusive cigarettes | No tobacco              | No tobacco              | 20           | 41,754     | 10.0       | (6.8-14.4)  | 73           | 305,263    | 11.0       | (8.2-14.7)  | 259          | 1,767,189  | 7.5        | (6.6-8.6)   |
| 2    | Exclusive cigarettes | No tobacco              | Exclusive cigarettes    | 7            | 17,873     | 4.3†       | (2.0-9.0)   | 29           | 127,530    | 4.6        | (3.1-6.8)   | 71           | 448,499    | 1.9        | (1.5-2.4)   |
| 3    | Exclusive cigarettes | No tobacco              | Exclusive other tobacco | 7            | 15,716     | 3.8†       | (1.7-8.0)   | 10           | 33,163     | 1.2†       | (0.6-2.3)   | 11           | 70,582     | 0.3†       | (0.2-0.5)   |
| 4    | Exclusive cigarettes | No tobacco              | Cigarette PTU           | 6            | 13,874     | 3.3†       | (1.4-7.6)   | 9            | 26,309     | 1.0†       | (0.5-2.0)   | 21           | 121,345    | 0.5        | (0.3-0.8)   |
| 5    | Exclusive cigarettes | No tobacco              | PTU w/o cigarettes      | 0            | N/A        | N/A        | N/A         | 3            | 10,596     | 0.4†       | (0.1-1.3)   | 1            | 7,581      | 0.0†       | (0.0-0.2)   |
| 6    | Exclusive cigarettes | Exclusive cigarettes    | No tobacco              | 4            | 9,419      | 2.3†       | (0.8-6.2)   | 29           | 109,265    | 3.9        | (2.5-6.2)   | 159          | 858,188    | 3.7        | (3.1-4.3)   |
| 7    | Exclusive cigarettes | Exclusive cigarettes    | Exclusive cigarettes    | 25           | 58,587     | 14.0       | (9.5-20.1)  | 219          | 723,374    | 26.1       | (22.9-29.6) | 2,318        | 12,656,998 | 53.9       | (52.1-55.7) |
| 8    | Exclusive cigarettes | Exclusive cigarettes    | Exclusive other tobacco | 0            | N/A        | N/A        | N/A         | 11           | 48,526     | 1.8†       | (0.9-3.3)   | 26           | 152,915    | 0.7        | (0.4-1.1)   |
| 9    | Exclusive cigarettes | Exclusive cigarettes    | Cigarette PTU           | 16           | 34,163     | 8.2        | (5.3-12.4)  | 87           | 292,578    | 10.6       | (8.2-13.5)  | 359          | 2,053,319  | 8.7        | (7.7-9.9)   |
| 10   | Exclusive cigarettes | Exclusive cigarettes    | PTU w/o cigarettes      | 0            | N/A        | N/A        | N/A         | 0            | N/A        | N/A        | N/A         | 0            | N/A        | N/A        | N/A         |
| 11   | Exclusive cigarettes | Exclusive other tobacco | No tobacco              | 4            | 6,536      | 1.6†       | (0.6-4.3)   | 15           | 46,170     | 1.7        | (1.1-2.6)   | 12           | 78,998     | 0.3†       | (0.2-0.7)   |
| 12   | Exclusive cigarettes | Exclusive other tobacco | Exclusive cigarettes    | 2            | 6,416      | 1.5†       | (0.4-6.2)   | 6            | 26,514     | 1.0†       | (0.3-2.7)   | 8            | 40,929     | 0.2†       | (0.1-0.4)   |
| 13   | Exclusive cigarettes | Exclusive other tobacco | Exclusive other tobacco | 1            | 1,503      | 0.4†       | (0.0-2.8)   | 5            | 16,981     | 0.6†       | (0.3-1.4)   | 15           | 86,205     | 0.4        | (0.2-0.7)   |
| 14   | Exclusive cigarettes | Exclusive other tobacco | Cigarette PTU           | 1            | 2,218      | 0.5†       | (0.1-3.3)   | 4            | 15,981     | 0.6†       | (0.2-1.6)   | 21           | 135,437    | 0.6        | (0.4-0.9)   |
| 15   | Exclusive cigarettes | Exclusive other tobacco | PTU w/o cigarettes      | 0            | N/A        | N/A        | N/A         | 2            | 6,878      | 0.2†       | (0.1-1.1)   | 2            | 12,522     | 0.1†       | (0.0-0.2)   |
| 16   | Exclusive cigarettes | Cigarette PTU           | No tobacco              | 7            | 19,996     | 4.8†       | (2.2-10.2)  | 24           | 81,860     | 3.0        | (1.9-4.6)   | 39           | 212,142    | 0.9        | (0.6-1.3)   |
| 17   | Exclusive cigarettes | Cigarette PTU           | Exclusive cigarettes    | 18           | 40,051     | 9.6        | (5.4-16.5)  | 119          | 385,988    | 13.9       | (11.5-16.9) | 450          | 2,396,278  | 10.2       | (9.2-11.3)  |
| 18   | Exclusive cigarettes | Cigarette PTU           | Exclusive other tobacco | 3            | 8,865      | 2.1†       | (0.7-6.6)   | 11           | 46,419     | 1.7†       | (0.8-3.4)   | 25           | 128,753    | 0.5        | (0.4-0.8)   |
| 19   | Exclusive cigarettes | Cigarette PTU           | Cigarette PTU           | 52           | 123,542    | 29.5       | (23.1-36.9) | 141          | 425,286    | 15.4       | (12.9-18.2) | 386          | 2,189,303  | 9.3        | (8.2-10.5)  |
| 20   | Exclusive cigarettes | Cigarette PTU           | PTU w/o cigarettes      | 2            | 5,599      | 1.3†       | (0.3-5.2)   | 4            | 15,116     | 0.5†       | (0.2-1.6)   | 2            | 15,734     | 0.1†       | (0.0-0.3)   |
| 21   | Exclusive cigarettes | PTU w/o cigarettes      | No tobacco              | 1            | 2,796      | 0.7†       | (0.1-4.8)   | 3            | 11,823     | 0.4†       | (0.1-1.4)   | 4            | 21,461     | 0.1†       | (0.0-0.2)   |
| 22   | Exclusive cigarettes | PTU w/o cigarettes      | Exclusive cigarettes    | 0            | N/A        | N/A        | N/A         | 2            | 6,654      | 0.2†       | (0.1-1.0)   | 0            | N/A        | N/A        | N/A         |
| 23   | Exclusive cigarettes | PTU w/o cigarettes      | Exclusive other tobacco | 1            | 3,342      | 0.8†       | (0.1-6.0)   | 0            | N/A        | N/A        | N/A         | 1            | 3,637      | 0.0†       | (0.0-0.1)   |
| 24   | Exclusive cigarettes | PTU w/o cigarettes      | Cigarette PTU           | 1            | 5,927      | 1.4†       | (0.2-10.1)  | 1            | 2,599      | 0.1†       | (0.0-0.7)   | 2            | 9,653      | 0.0†       | (0.0-0.3)   |
| 25   | Exclusive cigarettes | PTU w/o cigarettes      | PTU w/o cigarettes      | 0            | N/A        | N/A        | N/A         | 1            | 3,302      | 0.1†       | (0.0-0.9)   | 1            | 6,859      | 0.0†       | (0.0-0.2)   |

1 Notes:

2 Abbreviations: P30D = past 30-day; W2 = Wave 2; W3 = Wave 3; W1 = Wave 1; CI = confidence interval; PTU = polytobacco use; w/o = without; N/A = not applicable

3  
4 The analysis included youth (ages 12-17), young adult (ages 18-24), and adult 25+ (ages 25 and older) W1 P30D exclusive cigarette users with data at all three waves. Age was calculated based on age at W1. W3  
5 longitudinal (all-waves) weights were used to calculate estimates.  
6  
7

8 The weighted percentages for some constructs such as discontinued tobacco and persistent use in this table may not match exactly with those presented in Table 1. This is the result of different denominators. In this  
9 table there can be no missing values on tobacco use variables at any wave. Table 1 does not require this restriction since some outcomes reflect behaviors at W3 (e.g. discontinued use by W3), regardless of missing data  
10 at Wave 2.  
11

12 For transitions between waves:

13 1) No tobacco: Defined as no use of any tobacco products within the past 30 days.

14 2) Exclusive cigarettes: Defined as use of only cigarettes within the past 30 days.

15 3) Exclusive other Tobacco: Defined as use of only one of the following within the past 30 days: cigars, hookah, pipe, electronic nicotine delivery system (ENDS\*), or smokeless tobacco.

16 4) Cigarette PTU: Defined as use of cigarettes and one or more of the following within the past 30 days: cigars, hookah, pipe, ENDS, or smokeless tobacco.

17 5) PTU w/o cigarettes: Defined as use of two or more of the following within the past 30 days: cigars, hookah, pipe, ENDS, or smokeless tobacco but not cigarettes.  
18  
19

20 \*Respondents were asked about P30D use of “e-cigarettes” at W1 and W2 and “e-products” (e-cigarettes, e-cigars, e-pipes, and e-hookah) at W3  
21  
22

23 The logit-transformation method was used to calculate the 95% CIs.

24 † Estimate should be interpreted with caution because it has low statistical precision. It is based on a denominator sample size of less than 50, or the coefficient of variation of the estimate or its complement is larger  
25 than 30%.  
26  
27

28 Analyses were run on the W1, W2, and W3 Public Use Files (<https://doi.org/10.3886/ICPSR36498.v8>).  
29  
30  
31  
32  
33  
34  
35  
36  
37  
38  
39  
40  
41  
42  
43  
44  
45  
46  
47

Supplemental Table 1b: Transitions in P30D Product Use at W2 and W3 Among W1 P30D Cigarette Polytabacco Users.

| Rows | W1            | W2                      | W3                      | Youth           |               |               |             | Young Adults    |               |               |             | Adults 25+      |               |            |             |
|------|---------------|-------------------------|-------------------------|-----------------|---------------|---------------|-------------|-----------------|---------------|---------------|-------------|-----------------|---------------|------------|-------------|
|      |               |                         |                         | Unweighted<br>N | Weighted<br>N | Weighted<br>% | 95% CI      | Unweighted<br>N | Weighted<br>N | Weighted<br>% | 95% CI      | Unweighted<br>N | Weighted<br>N | Weighted % | 95% CI      |
| 1    | Cigarette PTU | No tobacco              | No tobacco              | 25              | 55,535        | 9.2           | (6.2-13.5)  | 65              | 239,504       | 4.4           | (3.2-6.0)   | 93              | 523,925       | 3.4        | (2.7-4.3)   |
| 2    | Cigarette PTU | No tobacco              | Exclusive cigarettes    | 2               | 4,112         | 0.7†          | (0.2-2.7)   | 25              | 97,117        | 1.8           | (1.2-2.7)   | 17              | 105,185       | 0.7        | (0.4-1.2)   |
| 3    | Cigarette PTU | No tobacco              | Exclusive other tobacco | 5               | 16,238        | 2.7†          | (1.4-5.3)   | 20              | 62,520        | 1.1           | (0.7-1.8)   | 10              | 68,368        | 0.4†       | (0.2-0.9)   |
| 4    | Cigarette PTU | No tobacco              | Cigarette PTU           | 9               | 21,208        | 3.5†          | (1.7-7.1)   | 28              | 91,334        | 1.7           | (1.1-2.5)   | 16              | 99,935        | 0.7        | (0.4-1.1)   |
| 5    | Cigarette PTU | No tobacco              | PTU w/o cigarettes      | 3               | 6,797         | 1.1†          | (0.3-3.7)   | 3               | 14,425        | 0.3†          | (0.1-0.9)   | 1               | 6,867         | 0.0†       | (0.0-0.3)   |
| 6    | Cigarette PTU | Exclusive cigarettes    | No tobacco              | 3               | 7,996         | 1.3†          | (0.4-4.8)   | 27              | 98,726        | 1.8           | (1.2-2.8)   | 55              | 294,609       | 1.9        | (1.4-2.7)   |
| 7    | Cigarette PTU | Exclusive cigarettes    | Exclusive cigarettes    | 10              | 22,785        | 3.8†          | (1.8-7.6)   | 149             | 516,076       | 9.4           | (7.8-11.3)  | 585             | 3,228,605     | 21.1       | (19.3-23.0) |
| 8    | Cigarette PTU | Exclusive cigarettes    | Exclusive other tobacco | 2               | 5,010         | 0.8†          | (0.2-3.5)   | 8               | 26,839        | 0.5†          | (0.2-1.1)   | 10              | 62,363        | 0.4†       | (0.2-0.8)   |
| 9    | Cigarette PTU | Exclusive cigarettes    | Cigarette PTU           | 16              | 33,364        | 5.5           | (3.3-9.1)   | 128             | 430,965       | 7.8           | (6.6-9.3)   | 247             | 1,356,492     | 8.9        | (7.5-10.4)  |
| 10   | Cigarette PTU | Exclusive cigarettes    | PTU w/o cigarettes      | 0               | N/A           | N/A           | N/A         | 2               | 7,353         | 0.1†          | (0.0-0.6)   | 0               | N/A           | N/A        | N/A         |
| 11   | Cigarette PTU | Exclusive other tobacco | No tobacco              | 5               | 13,126        | 2.2†          | (0.9-5.4)   | 26              | 92,351        | 1.7           | (1.1-2.7)   | 17              | 108,240       | 0.7        | (0.4-1.2)   |
| 12   | Cigarette PTU | Exclusive other tobacco | Exclusive cigarettes    | 0               | N/A           | N/A           | N/A         | 8               | 27,130        | 0.5†          | (0.2-1.0)   | 11              | 54,249        | 0.4†       | (0.2-0.7)   |
| 13   | Cigarette PTU | Exclusive other tobacco | Exclusive other tobacco | 2               | 3,369         | 0.6†          | (0.1-2.4)   | 30              | 106,613       | 1.9           | (1.3-2.8)   | 69              | 386,166       | 2.5        | (1.9-3.3)   |
| 14   | Cigarette PTU | Exclusive other tobacco | Cigarette PTU           | 12              | 25,976        | 4.3†          | (2.3-7.9)   | 19              | 65,778        | 1.2           | (0.7-1.9)   | 34              | 176,137       | 1.2        | (0.8-1.7)   |
| 15   | Cigarette PTU | Exclusive other tobacco | PTU w/o cigarettes      | 2               | 4,393         | 0.7†          | (0.2-2.9)   | 13              | 40,772        | 0.7†          | (0.4-1.4)   | 9               | 35,284        | 0.2†       | (0.1-0.5)   |
| 16   | Cigarette PTU | Cigarette PTU           | No tobacco              | 14              | 27,879        | 4.6           | (2.7-7.7)   | 73              | 241,085       | 4.4           | (3.5-5.5)   | 43              | 237,164       | 1.6        | (1.2-2.1)   |
| 17   | Cigarette PTU | Cigarette PTU           | Exclusive cigarettes    | 22              | 45,537        | 7.6           | (5.0-11.3)  | 225             | 796,404       | 14.5          | (12.6-16.6) | 453             | 2,449,593     | 16.0       | (14.4-17.7) |
| 18   | Cigarette PTU | Cigarette PTU           | Exclusive other tobacco | 6               | 13,863        | 2.3†          | (1.0-5.2)   | 48              | 207,423       | 3.8           | (2.7-5.2)   | 74              | 448,554       | 2.9        | (2.3-3.7)   |
| 19   | Cigarette PTU | Cigarette PTU           | Cigarette PTU           | 113             | 261,317       | 43.3          | (35.9-51.0) | 596             | 2,039,647     | 37.1          | (34.5-39.9) | 1,011           | 5,402,659     | 35.3       | (33.4-37.3) |
| 20   | Cigarette PTU | Cigarette PTU           | PTU w/o cigarettes      | 3               | 6,287         | 1.0†          | (0.3-3.3)   | 25              | 91,285        | 1.7           | (1.1-2.5)   | 16              | 92,073        | 0.6        | (0.4-1.0)   |
| 21   | Cigarette PTU | PTU w/o cigarettes      | No tobacco              | 3               | 7,785         | 1.3†          | (0.4-4.4)   | 12              | 43,154        | 0.8†          | (0.4-1.8)   | 0               | N/A           | N/A        | N/A         |
| 22   | Cigarette PTU | PTU w/o cigarettes      | Exclusive cigarettes    | 0               | N/A           | N/A           | N/A         | 2               | 7,144         | 0.1†          | (0.0-0.6)   | 2               | 8,780         | 0.1†       | (0.0-0.2)   |
| 23   | Cigarette PTU | PTU w/o cigarettes      | Exclusive other tobacco | 0               | N/A           | N/A           | N/A         | 10              | 36,167        | 0.7†          | (0.3-1.3)   | 10              | 61,627        | 0.4†       | (0.2-0.8)   |
| 24   | Cigarette PTU | PTU w/o cigarettes      | Cigarette PTU           | 4               | 10,295        | 1.7†          | (0.6-4.8)   | 16              | 53,671        | 1.0           | (0.6-1.6)   | 9               | 49,337        | 0.3†       | (0.1-0.9)   |
| 25   | Cigarette PTU | PTU w/o cigarettes      | PTU w/o cigarettes      | 4               | 10,246        | 1.7†          | (0.6-4.5)   | 15              | 57,360        | 1.0           | (0.6-1.8)   | 5               | 32,192        | 0.2†       | (0.1-0.5)   |

1 Notes:

2 Abbreviations: P30D = past 30-day; W2 = Wave 2; W3 = Wave 3; W1 = Wave 1; CI = confidence interval; PTU = polytobacco use; w/o = without; N/A = not applicable;

3  
4 The analysis included youth (ages 12-17), young adult (ages 18-24), and adult 25+ (ages 25 and older) W1 P30D cigarette polytobacco users with data at all three waves. Age was calculated based on age at W1. W3 longitudinal (all-  
5 waves) weights were used to calculate estimates at all waves.  
6  
7

8 The weighted percentages for some constructs such as discontinued tobacco and persistent use in this table may not match exactly with those presented in Table 1. This is the result of different denominators. In this table there can be no  
9 missing values on tobacco use variables at any wave. Table 2 does not require this restriction since some outcomes reflect behaviors at W3 (e.g. discontinued use by W3), regardless of missing data at Wave 2.  
10

11 For transitions between waves:

12 1) No tobacco: Defined as no use of any tobacco products within the past 30 days.

13 2) Exclusive cigarettes: Defined as use of only cigarettes within the past 30 days.

14 3) Exclusive other Tobacco: Defined as use of only one of the following within the past 30 days: cigars, hookah, pipe, electronic nicotine delivery system (ENDS\*), or smokeless tobacco.

15 4) Cigarette PTU: Defined as use of cigarettes and one or more of the following within the past 30 days: cigars, hookah, pipe, ENDS, or smokeless tobacco.

16 5) PTU w/o cigarettes: Defined as use of two or more of the following within the past 30 days: cigars, hookah, pipe, ENDS, or smokeless tobacco but not cigarettes.  
17  
18

19 \*Respondents were asked about P30D use of “e-cigarettes” at W1 and W2 and “e-products” (e-cigarettes, e-cigars, e-pipes, and e-hookah) at W3  
20

21 The logit-transformation method was used to calculate the 95% CIs.

22 † Estimate should be interpreted with caution because it has low statistical precision. It is based on a denominator sample size of less than 50, or the coefficient of variation of the estimate or its complement is larger than 30%.  
23  
24

25 Analyses were run on the W1, W2, and W3 Public Use Files (<https://doi.org/10.3886/ICPSR36498.v8>).  
26  
27  
28  
29  
30  
31  
32  
33  
34  
35  
36  
37  
38  
39  
40  
41  
42  
43  
44  
45  
46  
47
